# Supplementary material for: The RNA ligase RNA terminal phosphate cyclase B regulates mRNA alternative splicing and is required for mouse oocyte development and maintenance
Source: Oxford University Press journal article supplement (doi:10.1242/dev.200497), 2022-09-30
Supplement: dev200497supp.pdf [file dev200497supp.pdf]

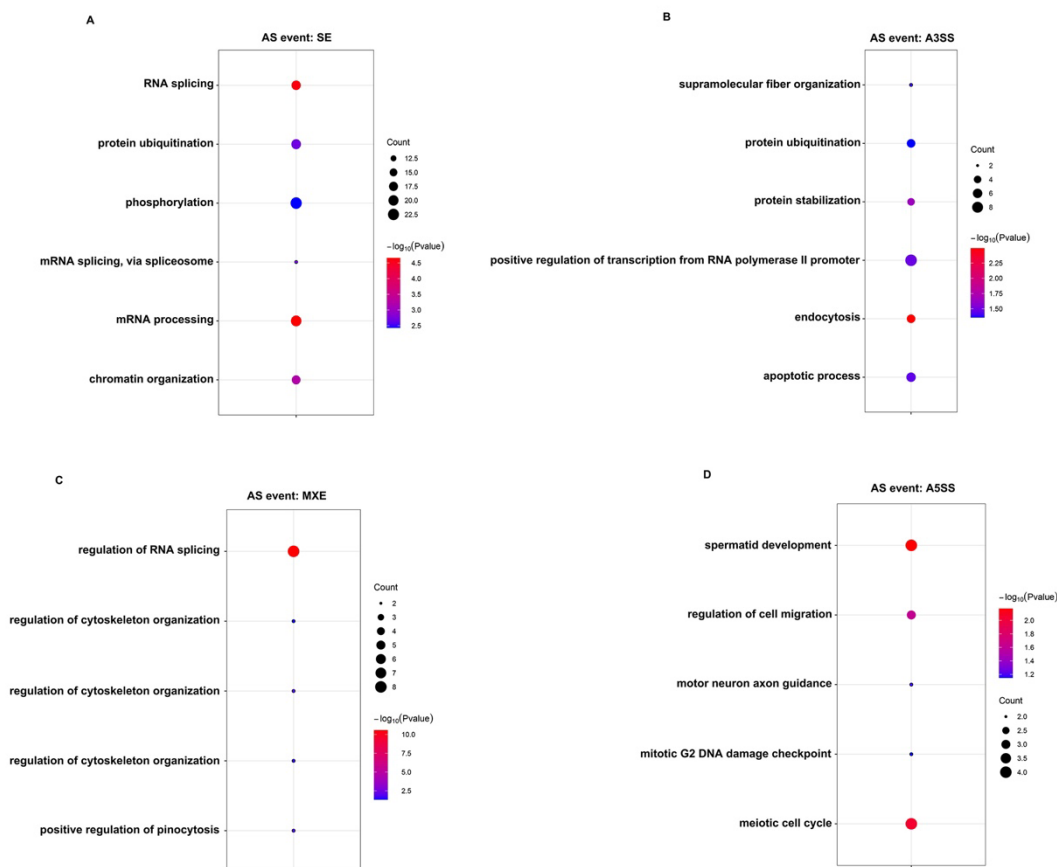

**Fig. S1. RNA splicing is the most enriched of the alternative splicing (AS) events.** **A:** The gene ontology (GO) enrichment analysis of Skipped exon (SE) events. **B:** The GO enrichment analysis of Alternative 3' splice site (A3SS) events. **C:** The GO enrichment analysis of Mutually exclusive exons (MXE) events. **D:** The GO enrichment analysis of Alternative 5' splice site (A5SS) events.

**Table S1.** Intron retention (IR) information for all genes was detected using IRFinder

[Click here to download Table S1](#)

**Table S2.** Significant intron retention (IR) changes in genes were filtered by p-value and IRChange

[Click here to download Table S2](#)

**Table S3.** Various alternative splicing (AS) events were detected using rMATS

[Click here to download Table S3](#)

**Table S4. Primer sequences**

| Primer name                | Genes targeted | Application                                  | Sequences (5'-3')                    |
|----------------------------|----------------|----------------------------------------------|--------------------------------------|
| <i>Rtcb</i> -flox-F        | <i>Rtcb</i>    | Genotyping                                   | 5'-GTCTCTGTTGATCAGACATAGC-3'         |
| <i>Rtcb</i> -flox-R        |                |                                              | 5'-ACAAGCTCTCCTTGAGTTCTATG-3'        |
| <i>Rtcb</i> -RT-F          |                | Real-time PCR                                | 5'-TTTCTGCCAGCCATGAAGCAGA-3'         |
| <i>Rtcb</i> -RT-R          |                |                                              | 5'-GGGTCATTCATATCAAAGGCAGCC-3'       |
| <i>Cre-1</i>               | <i>Gdf9-Cr</i> | Genotyping                                   | 5'-AAGAACCTGATGGACATGTTTCAG-3'       |
| <i>Cre-2</i>               |                |                                              | <i>e</i>                             |
| <i>Mbd1</i> -F             | <i>Mbd1</i>    | Real-time PCR                                | 5'-TTGGCTGTCCCCAGCAAGAAGA-3'         |
| <i>Mbd1</i> -R1            |                | Real-time PCR<br>(total mRNAs)               | 5'-ACAGGTGCATGTGAAGACGCAGAT-3'       |
| <i>Mbd1</i> -R2            |                | Real-time PCR<br>(mRNAs containing intron 4) | 5'-CCACCTGGTTCACTTTAAACCAATACTCAC-3' |
| <i>Dnmt3b</i> -F           | <i>Dnmt3b</i>  | Real-time PCR                                | 5'-TCTCGGAGACGTCGAGCATCATC-3'        |
| <i>Dnmt3b</i> -R1          |                | Real-time PCR<br>(total mRNAs)               | 5'-ACAGGTGCATGTGAAGACGCAGAT-3'       |
| <i>Dnmt3b</i> -R2          |                | Real-time PCR<br>(mRNAs containing intron 6) | 5'-CCACCTGGTTCACTTTAAACCAATACTCAC-3' |
| <i>Tdrd9</i> -intron 4-F   | <i>Tdrd9</i>   | Real-time PCR                                | 5'-CACAGTACGTGCTAGACCACTACACCC A-3'  |
| <i>Tdrd9</i> -intron 4-R1  |                | Real-time PCR<br>(total mRNAs)               | 5'-CTGATAGCCTACCAAGCCACCCAG-3'       |
| <i>Tdrd9</i> -intron 4-R2  |                | Real-time PCR<br>(mRNAs containing intron 4) | 5'-AGAGAAAGCTCACGTCCTGTGTCTCAC-3'    |
| <i>Tdrd9</i> -intron 25-F  |                | Real-time PCR                                | 5'-GGTGAACGTGGACTTCCAGAAGCA-3'       |
| <i>Tdrd9</i> -intron 25-R1 |                | Real-time PCR<br>(total mRNAs)               | 5'-CTCAGTGACATCGATTGTCAGGAGGA-3'     |
| <i>Tdrd9</i> -intron 25-R2 |                | Real-time PCR<br>(mRNAs containing intron 4) | 5'-AAGGCTCTAGGACAGAGTGGGCCA-3'       |

|                               |                |                                                |                                              |
|-------------------------------|----------------|------------------------------------------------|----------------------------------------------|
|                               |                | intron 25)                                     |                                              |
| <i>Tdrd9</i> -intron<br>27-F  |                | Real-time PCR                                  | 5'-GTAGACTATGGGAATAGGTCTCATGTAG<br>ACCTAG-3' |
| <i>Tdrd9</i> -intron<br>27-R1 |                | Real-time PCR<br>(total mRNAs)                 | 5'-CTGAAATGGAAGCTCCAAAACTGACA<br>-3'         |
| <i>Tdrd9</i> -intron<br>27-R2 |                | Real-time PCR<br>(mRNAs containg<br>intron 27) | 5'-CGTCCCCAGCCTCTTCTCAGTCTTA-3'              |
| <i>Rad50</i> -F               | <i>Rad50</i>   | Real-time PCR                                  | 5'-GCAATTATGAAATTTACAGTATGAAAA<br>TGG-3'     |
| <i>Rad50</i> -R1              |                | Real-time PCR<br>(total mRNAs)                 | 5'-CTTGCCCACGATAGGTACTCCGC-3'                |
| <i>Rad50</i> -R2              |                | Real-time PCR<br>(mRNAs containg<br>intron22)  | 5'-GAACAAGCATTGAGACACACCATGTT<br>AG-3'       |
| <i>MuERV-L</i> -F             | <i>MuERV-</i>  | Real-time PCR                                  | 5'-ATCGAAAGGCTCCAGACACAA-3'                  |
| <i>MuERV-L</i> -R             | <i>L</i>       |                                                | 5'-TTCAGCCAACCTTACAATGAGAG-3'                |
| <i>Npl</i> -F                 | <i>Npl</i>     | Real-time PCR                                  | 5'-GAACAGAAGGACTTGGCTTCAGC-3'                |
| <i>Npl</i> -R                 |                |                                                | 5'-CCTCAGCCTTAGCAGTAAACTCCTG-3'              |
| <i>Eif1a</i> -F               | <i>Eif1a</i>   | Real-time PCR                                  | 5'-AACAGGCGCAGAGGTAAAAA-3'                   |
| <i>Eif1a</i> -R               |                |                                                | 5'-GCACAGCCTCCTTACACCAT-3'                   |
| <i>Gucal1a</i> -F             | <i>Gucal1a</i> | Real-time PCR                                  | 5'-ACCGAGTGCCATCAGTGGTAT-3'                  |
| <i>Gucal1a</i> -R             |                |                                                | 5'-CTGCCACGTACTCCATGAAGT-3'                  |
| <i>Zscan4b</i> -F             | <i>Zscan4b</i> | Real-time PCR                                  | 5'-CAACAAGGCCAATACCAGATAATGCA-3<br>,         |
| <i>Zscan4b</i> -R             |                |                                                | 5'-ATGCTCATGGTTTTGTTCTTTCTGGG-3'             |
| <i>Zscan4c</i> -F             | <i>Zscan4c</i> | Real-time PCR                                  | 5'-GCCTTATGTCTGTTCCCTATGT-3'                 |
| <i>Zscan4c</i> -R             |                |                                                | 5'-CAGTCTCTGCTGAGGATGTTAG-3'                 |
| <i>Gapdh</i> -F               | <i>Gapdh</i>   | Real-time PCR                                  | 5'-ACACTGAGGACCAGGTTGTCTC-3'                 |
| <i>Gapdh</i> -R               |                |                                                | 5'-TACTCCTTGGAGGCCATGTAG-3'                  |

**Table S5. Antibody information**

| <b>Protein name</b>                     | <b>Manufacturer (catalogue number)</b> | <b>Applications (working dilution)</b> | <b>Website Link*</b>                                                                                                                                                                                                          |
|-----------------------------------------|----------------------------------------|----------------------------------------|-------------------------------------------------------------------------------------------------------------------------------------------------------------------------------------------------------------------------------|
| <b>RTCB</b>                             | Abcam<br>(ab98231)                     | WB (1:1000)                            | <a href="https://www.abcam.com/c22orf28-antibody-ab98231.html">https://www.abcam.com/c22orf28-antibody-ab98231.html</a>                                                                                                       |
| <b>H3K4me3</b>                          | Abcam<br>(ab8580)                      | IF (1:400)                             | <a href="http://www.abcam.com/histone-h3-tri-methyl-k4-antibody-chip-grade-ab8580.html">http://www.abcam.com/histone-h3-tri-methyl-k4-antibody-chip-grade-ab8580.html</a>                                                     |
| <b>H3K9me3</b>                          | Abcam<br>(ab8898)                      | IF (1:400)                             | <a href="http://www.abcam.com/Histone-H3-tri-methyl-K9-antibody-ChIP-Grade-ab8898.html">http://www.abcam.com/Histone-H3-tri-methyl-K9-antibody-ChIP-Grade-ab8898.html</a>                                                     |
| <b>FITC-<math>\alpha</math>-Tubulin</b> | Sigma-Aldrich<br>(F2168)               | IF (1:500)                             | <a href="http://www.sigmaaldrich.com/catalog/product/sigma/f2168?lang=zh&amp;region=CN">http://www.sigmaaldrich.com/catalog/product/sigma/f2168?lang=zh&amp;region=CN</a>                                                     |
| <b>5mC</b>                              | Calbiochem<br>(NA81)                   | IF (1:500)                             | <a href="http://www.emdmillipore.com/US/en/product/Anti-5-Methylcytosine-Mouse-mAb-(162-33-D3),EMD_BIO-NA81">http://www.emdmillipore.com/US/en/product/Anti-5-Methylcytosine-Mouse-mAb-(162-33-D3),EMD_BIO-NA81</a>           |
| <b>5hmC</b>                             | Active motif<br>(39769)                | IF (1:400)                             | <a href="https://www.activemotif.com/catalog/details/39769/5-hydroxymethylcytidine-5-hmc-antibody">https://www.activemotif.com/catalog/details/39769/5-hydroxymethylcytidine-5-hmc-antibody</a>                               |
| <b>FLAG</b>                             | Sigma-Aldrich<br>(F3165)               | WB (1:2000)                            | <a href="http://www.sigmaaldrich.com/catalog/product/sigma/f3165?lang=zh&amp;region=CN">http://www.sigmaaldrich.com/catalog/product/sigma/f3165?lang=zh&amp;region=CN</a>                                                     |
| <b>p-H2AX</b>                           | Cell Signaling<br>(9718S)              | IF(1:200);<br>WB(1:1000)               | <a href="http://www.cellsignal.com/products/primary-antibodies/phospho-histone-h2a-x-ser139-20e3-rabbit-mab/9718">http://www.cellsignal.com/products/primary-antibodies/phospho-histone-h2a-x-ser139-20e3-rabbit-mab/9718</a> |
| <b>DDB1</b>                             | Epitomics<br>(3821-1)                  | WB (1:2500)                            | <a href="http://www.epitomics.com/products/search/DDB1">http://www.epitomics.com/products/search/DDB1</a>                                                                                                                     |
| <b>MVH</b>                              | Abcam<br>(ab13840)                     | IHC(1:500)                             | <a href="http://www.abcam.com/ddx4-mvh-antibody-primordial-germ-cell-marker-ab13840.html">http://www.abcam.com/ddx4-mvh-antibody-primordial-germ-cell-marker-ab13840.html</a>                                                 |
| <b>Cyclin B1</b>                        | Cell Signaling<br>(4138)               | WB (1:1000)                            | <a href="https://www.cst-c.com.cn/products/primary-antibodies/cyclin-b1-antibody/4138">https://www.cst-c.com.cn/products/primary-antibodies/cyclin-b1-antibody/4138</a>                                                       |
| <b>CDC20</b>                            | Abcam<br>(ab26483)                     | WB (1:1000)                            | <a href="https://www.abcam.cn/cdc20-antibody-ab26483.html">https://www.abcam.cn/cdc20-antibody-ab26483.html</a>                                                                                                               |
| <b>p-CDK1 (T161)</b>                    | Abcam<br>(ab201008)                    | WB (1:1000)                            | <a href="https://www.abcam.com/cdk1-phospho-t161-antibody-epr19546-ab201008.html#lb">https://www.abcam.com/cdk1-phospho-t161-antibody-epr19546-ab201008.html#lb</a>                                                           |
| <b>p-CDK1 (T14/Y15)</b>                 | Thermo Fisher<br>(17H29L7)             | IF (1:200)                             | <a href="https://www.thermofisher.cn/cn/zh/antibody/product/Phospho-CDK1-Thr14-Tyr15-Antibody-">https://www.thermofisher.cn/cn/zh/antibody/product/Phospho-CDK1-Thr14-Tyr15-Antibody-</a>                                     |

|                          |                          |             |                                                                                                                                                                                                         |
|--------------------------|--------------------------|-------------|---------------------------------------------------------------------------------------------------------------------------------------------------------------------------------------------------------|
|                          |                          |             | clone-17H29L7-Recombinant-Monoclonal/701808                                                                                                                                                             |
| <b>p-lamin A/C (S22)</b> | Cell Signaling (2026)    | IF (1:200)  | <a href="https://www.cellsignal.com/products/primary-antibodies/phospho-lamin-a-c-ser22-antibody/2026">https://www.cellsignal.com/products/primary-antibodies/phospho-lamin-a-c-ser22-antibody/2026</a> |
| <b>RAD50</b>             | Abcam (ab124682)         | WB (1:1000) | <a href="https://www.abcam.com/rad50-antibody-epr34662-ab124682.html#lb">https://www.abcam.com/rad50-antibody-epr34662-ab124682.html#lb</a>                                                             |
| <b>DNMT1</b>             | Cell Signaling (5032S)   | WB (1:1000) | <a href="https://www.cellsignal.cn/products/primary-antibodies/dnmt1-d63a6-xp-rabbit-mab/5032">https://www.cellsignal.cn/products/primary-antibodies/dnmt1-d63a6-xp-rabbit-mab/5032</a>                 |
| <b>DNMT3A</b>            | Proteintech (19366-1-AP) | WB (1:1000) | <a href="https://www.ptgen.com/products/DNMT3A-Antibody-19366-1-AP.htm">https://www.ptgen.com/products/DNMT3A-Antibody-19366-1-AP.htm</a>                                                               |
| <b>DNMT3B</b>            | Abcam (ab122932)         | WB (1:3000) | <a href="https://www.abcam.com/dnmt3b-antibody-ab122932.html">https://www.abcam.com/dnmt3b-antibody-ab122932.html</a>                                                                                   |
